# Supplementary material
Source: PubMed Central journal article supplement (PMC6378876)
Supplement: NIHMS1007837-supplement-Supplemental_Figure_1.pdf [file NIHMS1007837-supplement-Supplemental_Figure_1.pdf]

# Supplemental Figure 1

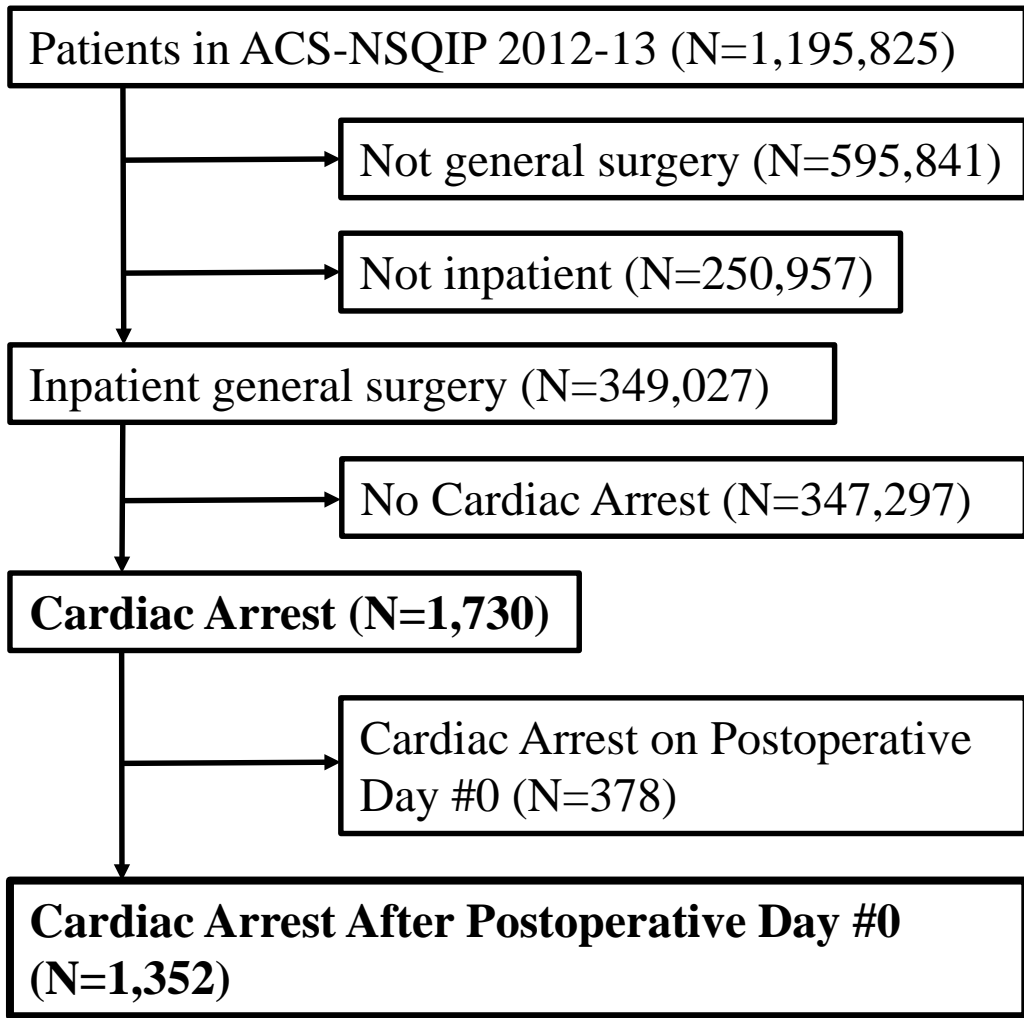

**Supplemental Figure 1.** Selection of inpatient general surgery patients experiencing cardiac arrest, American College of Surgeons National Surgical Quality Improvement Program, 2012-2013.
