# Supplementary material
Source: PubMed Central journal article supplement (PMC6378876)
Supplement: NIHMS1007837-supplement-Supplemental_Figure_3.pdf [file NIHMS1007837-supplement-Supplemental_Figure_3.pdf]

# Supplemental Figure 3

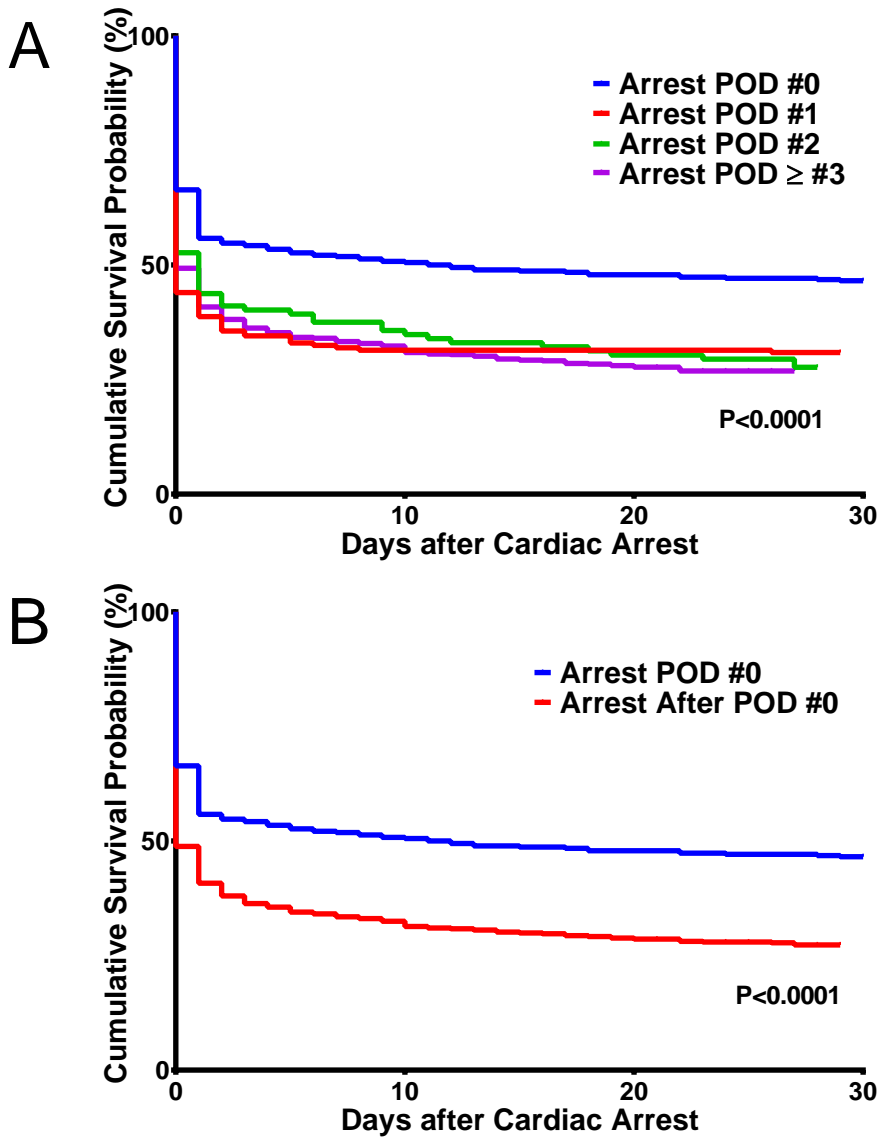

**Supplemental Figure 3.** Kaplan-Meier survival plots of inpatient general surgery patients experiencing cardiac arrest, American College of Surgeons National Surgical Quality Improvement Program, 2012-2013. The sample was stratified by (A) the postoperative day (POD) of cardiac arrest and (B) cardiac arrest on POD #0 vs. after POD #0. P-values are presented for the log-rank test.
