# Supplementary material
Source: PubMed Central journal article supplement (PMC6378876)
Supplement: NIHMS1007837-supplement-Supplemental_Table_2.pdf [file NIHMS1007837-supplement-Supplemental_Table_2.pdf]

**Supplemental Table 2.** Clinical Classifications Software categories of primary procedure in general surgery patients with cardiac arrest, American College of Surgeons National Surgical Quality Improvement Program, 2012-2013.

| Category                                                | All Patients |       | No Complication |             | Complication |             |
|---------------------------------------------------------|--------------|-------|-----------------|-------------|--------------|-------------|
|                                                         | N            | %     | N               | %           | N            | %           |
| Colorectal resection                                    | 486          | (36)  | 199             | (41)        | 287          | (59)        |
| Small bowel resection                                   | 103          | (7.6) | 41              | (40)        | 62           | (60)        |
| Other hernia repair                                     | 96           | (7.1) | 53              | (55)        | 43           | (45)        |
| Ileostomy and other enterostomy                         | 81           | (6.0) | 28              | (35)        | 53           | (65)        |
| Other OR gastrointestinal therapeutic procedures        | 81           | (6.0) | 29              | (36)        | 52           | (64)        |
| Other OR upper GI therapeutic procedures                | 71           | (5.3) | 27              | (38)        | 44           | (62)        |
| Other OR lower GI therapeutic procedures                | 56           | (4.1) | 29              | (52)        | 27           | (48)        |
| Cholecystectomy and common duct exploration             | 50           | (3.7) | 28              | (56)        | 22           | (44)        |
| Debridement of wound, infection or burn                 | 38           | (2.8) | 21              | (55)        | 17           | (45)        |
| Excision, lysis peritoneal adhesions                    | 38           | (2.8) | 24              | (63)        | 14           | (37)        |
| Exploratory laparotomy                                  | 36           | (2.7) | 11              | (31)        | 25           | (69)        |
| Amputation of lower extremity                           | 29           | (2.1) | 18              | (62)        | 11           | (38)        |
| Gastric bypass and volume reduction                     | 21           | (1.6) | 14              | (67)        | 7            | (33)        |
| Appendectomy                                            | 18           | (1.3) | 11              | (61)        | 7            | (39)        |
| Laparoscopy                                             | 17           | (1.3) | 9               | (53)        | 8            | (47)        |
| Colostomy, temporary and permanent                      | 15           | (1.1) | 7               | (47)        | 8            | (53)        |
| Gastrectomy, partial and total                          | 11           | (0.8) | 2               | (18)        | 9            | (82)        |
| Inguinal and femoral hernia repair                      | 10           | (0.7) | 6               | (60)        | 4            | (40)        |
| Mastectomy                                              | 9            | (0.7) | 7               | (78)        | 2            | (22)        |
| Lobectomy or pneumonectomy                              | 8            | (0.6) | 3               | (38)        | 5            | (63)        |
| Procedures on spleen                                    | 8            | (0.6) | 1               | (13)        | 7            | (88)        |
| Other OR procedures on vessels other than head and neck | 7            | (0.5) | 2               | (29)        | 5            | (71)        |
| Other therapeutic endocrine procedures                  | 7            | (0.5) | 4               | (57)        | 3            | (43)        |
| Excision of skin lesion                                 | 5            | (0.4) | 5               | (100)       | 0            | (0)         |
| Other categories                                        | 51           | (3.8) | 27              | (53)        | 24           | (47)        |
| <b>Total</b>                                            | <b>1,352</b> |       | <b>606</b>      | <b>(45)</b> | <b>746</b>   | <b>(55)</b> |

OR, operating room; GI, gastrointestinal.
