# Supplementary material
Source: PubMed Central journal article supplement (PMC6378876)

# Supplemental Figure 2

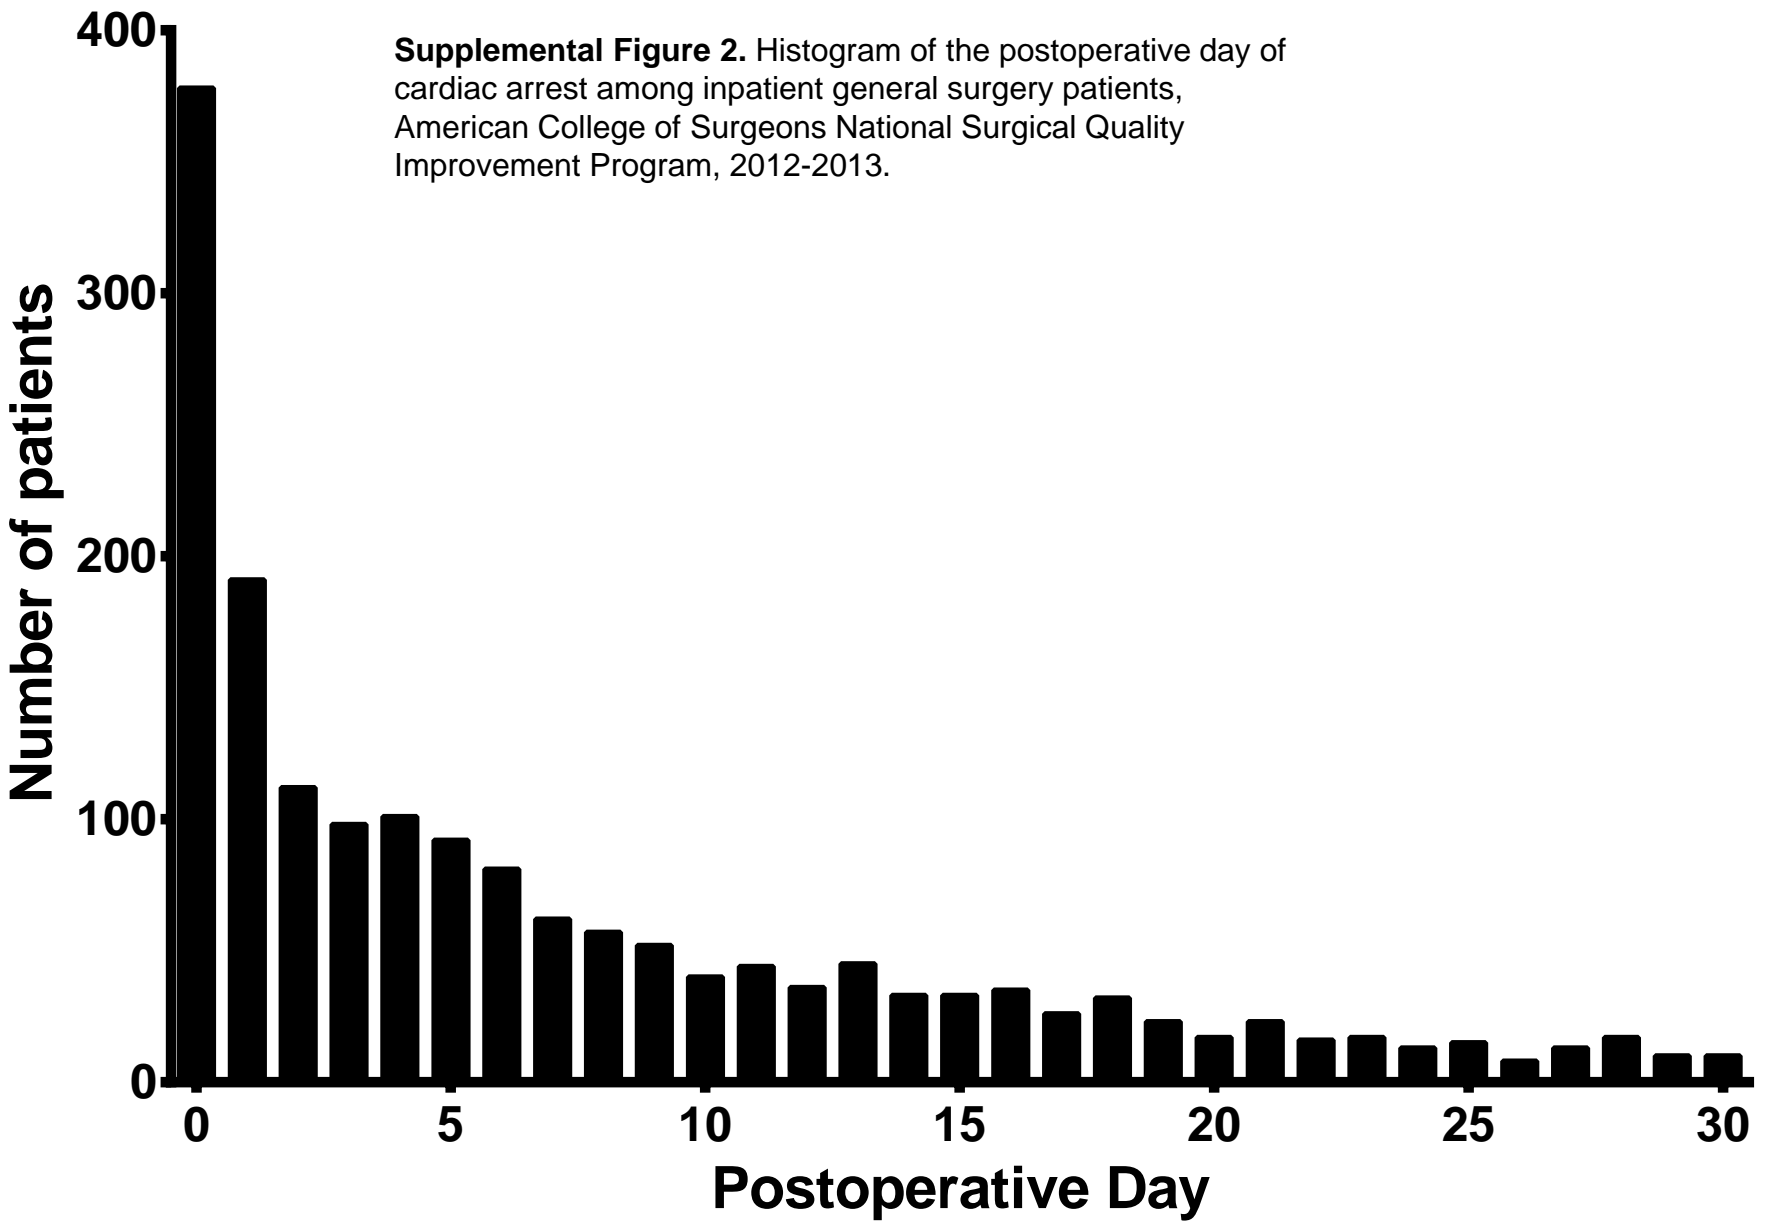

Supplement: NIHMS1007837-supplement-Supplemental_Figure_2.pdf [file NIHMS1007837-supplement-Supplemental_Figure_2.pdf]
